# Supplementary material
Source: publisher site journal article supplement (https://www.dovepress.com/get_supplementary_file.php?f=474862.docx)
Supplement: Supplementary file 1 [file get_supplementary_file.php]

**Supplemental Materials**

**Tabel S1.** Distribution of missing variables

| Variables | Total sample  (n=1128) | Development cohort  (n=790) | Validation cohort  (n=338) |
| --- | --- | --- | --- |
| Systolic blood pressure | 5(0.44%) | 3(0.38%) | 2(0.60%) |
| Diastolic blood pressure | 5(0.44%) | 3(0.38%) | 2(0.60%) |
| BMI | 24(2.13%) | 22(2.78%) | 2(0.59%) |
| Heart rate | 74(6.56%) | 33(4.18%) | 41(12.13%) |
| Red cell distribution width | 273(24.20%) | 204(25.82%) | 69(20.41%) |
| Hemoglobin | 42(3.72%) | 41(5.19%) | 1(0.30%) |
| ALT | 77(6.83%) | 28(3.54%) | 49(14.50%) |
| AST | 378(23.97%) | 250(23.08%) | 128(25.91%) |
| TBIL | 121(10.72%) | 119(15.06%) | 2(0.59%) |
| ALP | 420(37.23%) | 297(37.59%) | 123(36.39%) |
| TBA | 328(29.09%) | 226(28.61%) | 102(30.18%) |
| GLU | 323(28.63%) | 220(27.85%) | 103(30.47%) |
| TC | 108(9.57%) | 81(10.25%) | 27(7.99%) |
| TG | 107(9.49%) | 84(10.63%) | 23(6.80%) |
| HDLC | 112(9.93%) | 61(7.72%) | 51(15.09%) |
| LDLC | 109(9.66%) | 77(9.74%) | 32(9.47%) |
| BUN | 76(6.74%) | 75(9.49%) | 1(0.30%) |
| Uric acid | 93(8.24%) | 91(11.52%) | 2(0.59%) |
| Potassium | 66(5.85%) | 28(3.54%) | 38(11.24%) |
| Sodium | 68(6.03%) | 18(2.28%) | 50(14.79%) |
| Chlorine | 56(4.96%) | 40(5.06%) | 16(4.73%) |
| Cystatin C | 310(27.48%) | 184(23.29%) | 126(37.28%) |
| FT3 | 383(33.95%) | 255(32.28%) | 128(37.87%) |
| FT4 | 383(33.95%) | 255(32.28%) | 128(37.87%) |
| TSH | 394(34.93%) | 279(35.31%) | 115(34.02%) |
| Troponin-I | 450(39.89%) | 300(37.97%) | 150(44.38%) |
| HBA1C | 451(40.00%) | 353(44.68%) | 98(28.99%) |
| Lg of NT-proBNP | 146(12.94%) | 143(18.10%) | 3(0.89%) |
| Urinary specific gravity | 361(32.00%) | 251(31.77%) | 110(32.54) |
| LA | 351(31.17%) | 240(30.38%) | 111(32.84%) |
| IVS | 170(15.07%) | 142(17.97%) | 28(8.28%) |
| LVDD | 147(13.03%) | 93(11.77%) | 54(15.98%) |
| LVPW | 254(22.52%) | 162(20.51%) | 92(27.22%) |
| RV | 128(11.35%) | 69(8.73%) | 59(17.46%) |
| Ejection fraction | 126(11.17%) | 110(13.92%) | 16(4.73%) |
| SDNN | 935(82.89%) | 645(81.65%) | 290(85.80%) |
| SDANN | 935(82.89%) | 645(81.65%) | 290(85.80%) |
| RMSSD | 935(82.89%) | 645(81.65%) | 290(85.80%) |
| SDNNINDEX | 933(82.71%) | 686(86.84%) | 247(73.08%) |
| PNN50 | 933(82.71%) | 686(86.84%) | 247(73.08%) |
| TP | 941(83.42%) | 637(80.63%) | 304(89.94%) |
| LFP | 941(83.42%) | 637(80.63%) | 304(89.94%) |
| HFP | 1059(93.88%) | 734(92.91%) | 325(96.15%) |
| LVEDV | 1043(92.46%) | 721(91.27%) | 322(95.27%) |
| LVESV | 1043(92.46%) | 721(91.27%) | 322(95.27%) |
| PAP | 827(73.32%) | 571(72.28%) | 256(75.74%) |

**Abbreviations:** BMI: Body Mass Index; ALT: Alanine amino transferase; AST: Aspartate amino transferase; TBIL: Serum total bilirubin; ALP: Alkaline phosphatase; TBA: Serum total bile acid; GLU: blood glucose; TC: Total cholesterol; TG: triglyceride; HDLC: High-density lipoprotein; LDLC: Low-density lipoprotein; BUN: Blood urea nitrogen; FT3: Free thyroxine-3; FT4: Free thyroxine-4 ; TSH: Thyroid Stimulating Hormone; LA: left atrial diameter; IVS: inter ventricular septal thickness; LVDD : left ventricular end diastolic diameter; LVPW : left ventricle post wall; RV : Right Ventricular End-diastolic Diamete; SDNN: Standard deviation of NN intervals,the standard deviation of the 24-hour normal heartbeat interval; SDANN: Standard deviation of the average N-N intervals, the average of each 5-minute interval was calculated, and then the standard deviation of the mean interval was calculated; RMSSD: root mean square of successive differences between normal heartbeats; SDNN index: standard deviation of all N-N intervals for all 5-minute segments of 24 hours; PNN50: percent of N-N 50 in the total number N-N intervals; TP: frequency domain parameters include: total power; LFP: low frequency power; HFP: high frequency power; LVEDV: Left Ventricle End diastolic Volume; LVESV: Left Ventricular End Systolic Volume; PAP: pulmonary artery pressure.

**Table S2.** Baseline characteristics of the development cohort and validation cohort

| Variable | Development cohort (n=790) | Validation cohort (n=338) | t/*χ²/Z* | *P*value |
| --- | --- | --- | --- | --- |
| Age, years | 67 (60, 76) | 68 (59, 77) | -0.266 | 0.790 |
| Gender |  |  | 0.119 | 0.730 |
| Male | 562 (71.1) | 237 (70.1) |  |  |
| Female | 228 (28.9) | 101 (29.9) |  |  |
| Occupation |  |  | 1.051 | 0.305 |
| Manual workers | 275 (34.8) | 107 (31.7) |  |  |
| Nonmanual workers | 515 (65.2) | 231 (68.3) |  |  |
| Healthcare |  |  | 4.192 | 0.123 |
| Urban medical insurance | 471 (59.6) | 223 (66.0) |  |  |
| Rural medical insurance | 231 (29.2) | 81 (24.0) |  |  |
| Self-paying | 88 (11.1) | 34 (10.1) |  |  |
| Smoking history | 381 (48.2) | 183 (54.1) | 5.772 | 0.027 |
| Drinking history | 181 (22.9) | 97 (28.7) | 4.268 | 0.039 |
| NYHA |  |  | 1.550 | 0.461 |
| II | 329 (41.6) | 135 (39.9) |  |  |
| III | 298 (37.7) | 122 (36.1) |  |  |
| IV | 163 (20.6) | 81 (24.0) |  |  |
| BMI(kg/m2) | 24.2 (22.2, 26.7) | 24.1 (22.0, 27.0) | -0.758 | 0.448 |
| Heart rate(bpm) | 72 (66, 80) | 74 (66, 82) | -1.141 | 0.254 |
| Systolic blood pressure(mmHg) | 130 (118, 140) | 130 (114, 140) | -0.395 | 0.693 |
| Diastolic blood pressure(mmHg) | 80 (70, 84) | 79 (70, 86) | -0.601 | 0.548 |
| **Laboratory indicators** |  |  |  |  |
| Lg of NT-proBNP(pg/mL) | 3.1 (2.7, 3.5) | 3.2 (2.7, 3.5) | -1.133 | 0.257 |
| Cystatin C(mg/L) | 1.1 (1.0, 1.4) | 1.2 (1.0, 1.5) | -0.682 | 0.495 |
| eGFR[ml/(min·1.73m²)] | 90.8 (70.7, 104.4) | 91.5 (66.9, 109.8) | -0.347 | 0.729 |
| UA(μmol/L) | 369.0 (315.0, 433.0) | 380.5 (315.5, 465.3) | -1.693 | 0.090 |
| TC(mmol/L) | 4.1 (3.4, 4.9) | 4.0 (3.4, 4.7) | -0.615 | 0.538 |
| TG(mmol/L) | 1.4 (1.1, 1.9) | 1.4 (1.0, 1.8) | -0.881 | 0.378 |
| HDLC(mmol/L) | 1.0 (0.8, 1.1) | 1.0 (0.8, 1.1) | -0.680 | 0.496 |
| LDLC(mmol/L) | 2.4 (1.9, 3.1) | 2.4 (2.0, 3.0) | -0.601 | 0.548 |
| RDW(%) | 14.0 (13.4, 14.8) | 14.0 (13.5, 15.0) | -0.865 | 0.387 |
| HGB(g/L) | 137.1 (125.0, 149.0) | 136.0 (124.0, 147.0) | -1.843 | 0.065 |
| ALT(U/L) | 20.0 (13.5, 31.0) | 21.4 (14.0, 34.0) | -1.659 | 0.097 |
| AST(U/L) | 26.3 (21.0, 39.0) | 27.1 (21.0, 41.8) | -0.051 | 0.959 |
| ALB(g/L) | 43.0 (40.0, 46.0) | 43.0 (39.2, 46.0) | -0.571 | 0.568 |
| TBIL(mmol/l) | 14.9 (11.3, 19.6) | 14.8 (11.2, 19.2) | -0.019 | 0.985 |
| K(mmol/l) | 4.1 (3.8, 4.4) | 4.0 (3.8, 4.3) | -1.725 | 0.084 |
| Na(mmol/l) | 140 (138, 141) | 139 (137, 141) | -0.697 | 0.486 |
| **Electrocardiogram** |  |  |  |  |
| QRS(ms) | 98 (90, 110) | 100 (90, 114) | -1.755 | 0.079 |
| QTC(ms) | 440 (418, 468) | 444 (418, 472) | -1.137 | 0.255 |
| **Echocardiographic indices** |  |  |  |  |
| IVS(mm) | 9 (8, 11) | 9 (8, 11) | -0.585 | 0.559 |
| LVDd(mm) | 56 (51, 59) | 56 (52, 59) | -0.931 | 0.352 |
| LVPW(mm) | 9 (9, 10) | 9 (9, 10) | -1.220 | 0.222 |
| Ejection fraction (%) | 45 (43, 47) | 45 (43, 46) | -0.871 | 0.384 |
| **Comorbidities** |  |  |  |  |
| Hypertension | 480 (60.8) | 184 (54.4) | 3.907 | 0.048 |
| Diabetes | 249 (31.5) | 123 (36.4) | 2.542 | 0.111 |
| Stroke | 194 (24.6) | 84 (24.9) | 0.011 | 0.916 |
| Ischemic heart disease | 633 (80.1) | 268 (79.3) | 0.103 | 0.748 |
| COPD | 142 (18.0) | 71 (21.0) | 2.714 | 0.087 |
| AF | 227 (28.7) | 98(29.0) | 3.253 | 0.055 |
| Hyperlipidemia | 145 (18.4) | 66 (19.5) | 0.214 | 0.644 |
| Valvular heart disease | 59 (7.5) | 38 (11.2) | 4.290 | 0.038 |
| Renal insufficiency | 82 (10.4) | 46 (13.6) | 2.455 | 0.117 |
| **Therapy** |  |  |  |  |
| Antiplatelet drug | 727 (92.0) | 306 (90.5) | 0.684 | 0.408 |
| Vasodilator | 535 (67.7) | 234 (69.2) | 0.249 | 0.618 |
| Beta-blocker | 190 (24.1) | 73 (21.6) | 0.797 | 0.372 |
| ACEI/ARB/ARNI | 455 (57.6) | 170 (50.3) | 3.304 | 0.054 |
| Statins | 732 (92.7) | 308 (91.1) | 0.774 | 0.379 |
| Diuretic | 636 (80.5) | 275 (81.4) | 0.111 | 0.739 |
| Cardiotonic | 91 (11.5) | 46 (13.6) | 0.970 | 0.325 |
| PCI/CABG | 274 (34.7) | 113 (33.4) | 0.165 | 0.685 |

**Abbreviations:** NYHA: New York Heart Association; BMI: body mass index; NT-proBNP: N-terminal pro-B-type natriuretic peptide; eGFR: estimated glomerular filtration rate; UA: uric acid; TC: total cholesterol; TG: triglyceride; HDLC: high-density lipoprotein; LDLC: low-density lipoprotein; RDW: red blood cell distribution width; HGB: hemoglobin; ALT: alanine aminotransferase; AST: aspartate aminotransferase; ALB: albumin; TBIL: serum total bilirubin; LA: left atrial diameter; IVS: interventricular septal thickness; LVDD: left ventricular end-diastolic diameter; LVPW: left ventricle post wall; RV: right ventricular end-diastolic diameter; AF: atrial fibrillation; COPD: chronic obstructive pulmonary disease; ACEI: angiotensin-converting enzyme inhibitors; ARB: angiotensin receptor blockers; ARNI: angiotensin receptor-neprilysin inhibitor; PCI: percutaneous coronary intervention; CABG: coronary artery bypass graft.

**Table S3.** Univariate Cox analysis of all-cause mortality in HFmrEF

| Variable | HR | 95% CI | *P* value |
| --- | --- | --- | --- |
| Age | 1.06 | 1.03-1.08 | <0.001 |
| Gender |  |  |  |
| Male | rec |  |  |
| Female | 1.67 | 1.05-2.67 | 0.032 |
| Smoking history | 0.66 | 0.41-1.06 | 0.083 |
| Drinking history | 0.59 | 0.31-1.11 | 0.103 |
| Occupation |  |  |  |
| Manual workers | rec |  |  |
| Nonmanual workers | 1.70 | 1.00-2.89 | 0.042 |
| Healthcare |  |  |  |
| Urban medical insurance | rec |  |  |
| Rural medical insurance | 0.69 | 0.38-1.24 | 0.210 |
| Self-paying | 1.93 | 1.07-3.48 | 0.028 |
| BMI | 0.92 | 0.86-0.98 | 0.011 |
| NYHA |  |  |  |
| II | rec |  |  |
| III | 1.67 | 0.87-3.22 | 0.126 |
| IV | 5.58 | 3.05-10.21 | <0.001 |
| Systolic blood pressure | 1.00 | 0.99-1.01 | 0.638 |
| Diastolic blood pressure | 1.00 | 0.98-1.02 | 0.850 |
| Heart rate | 0.99 | 0.97-1.01 | 0.396 |
| Lg of NT-proBNP | 4.83 | 3.15-7.39 | <0.001 |
| Cystatin C | 1.19 | 1.03-1.37 | 0.017 |
| eGFR | 0.98 | 0.97-0.98 | <0.001 |
| UA | 1.00 | 1.00-1.00 | 0.711 |
| TC | 1.01 | 0.90-1.13 | 0.861 |
| TG | 0.83 | 0.61-1.14 | 0.254 |
| HDLC | 1.54 | 0.68-3.48 | 0.295 |
| LDLC | 0.99 | 0.89-1.10 | 0.866 |
| RDW | 1.09 | 1.02-1.17 | 0.014 |
| HGB | 0.99 | 0.98-1.00 | 0.006 |
| ALT | 1.00 | 0.98-1.01 | 0.454 |
| AST | 1.00 | 0.99-1.00 | 0.226 |
| ALB | 0.96 | 0.93-0.99 | 0.003 |
| TBIL | 1.01 | 0.99-1.02 | 0.364 |
| K | 0.92 | 0.61-1.37 | 0.669 |
| Na | 1.00 | 0.95-1.04 | 0.902 |
| QRS | 1.00 | 0.99-1.01 | 0.448 |
| QTC | 1.00 | 1.00-1.01 | 0.376 |
| IVS | 1.17 | 1.04-1.31 | 0.010 |
| LVDd | 0.99 | 0.96-1.02 | 0.635 |
| LVPW | 1.03 | 0.98-1.08 | 0.258 |
| Ejection fraction | 0.91 | 0.82-1.00 | 0.057 |
| AF | 1.65 | 1.35-1.88 | 0.012 |
| COPD | 1.42 | 0.91-2.63 | 0.052 |
| Hypertension | 1.24 | 0.77-2.02 | 0.375 |
| Valvular heart disease | 1.65 | 0.79-3.43 | 0.184 |
| Hyperlipidemia | 1.05 | 0.59-1.89 | 0.862 |
| Ischemic heart disease | 0.82 | 0.47-1.40 | 0.463 |
| Diabetes | 1.22 | 0.76-1.97 | 0.414 |
| Stroke | 3.38 | 2.14-5.35 | <0.001 |
| Renal | 2.37 | 1.35-4.19 | 0.003 |
| Antiplatelet drug | 0.40 | 0.21-0.74 | 0.003 |
| Vasodilator | 0.85 | 0.52-1.37 | 0.498 |
| Beta-blocker | 0.95 | 0.55-1.63 | 0.840 |
| ACEI/ARB/ARNI | 0.30 | 0.18-0.50 | <0.001 |
| Statins | 0.48 | 0.25-0.93 | 0.030 |
| Diuretic | 0.94 | 0.53-1.66 | 0.838 |
| Cardiotonic | 1.24 | 0.64-2.42 | 0.524 |
| PCI/CABG | 0.36 | 0.19-0.66 | 0.001 |

**Abbreviations:** NYHA: New York Heart Association; BMI: body mass index; NT-proBNP: N-terminal pro-B-type natriuretic peptide; eGFR: estimated glomerular filtration rate; UA: uric acid; TC: total cholesterol; TG: triglyceride; HDLC: high-density lipoprotein; LDLC: low-density lipoprotein; RDW: red blood cell distribution width; HGB: hemoglobin; ALT: alanine aminotransferase; AST: aspartate aminotransferase; ALB: albumin; TBIL: serum total bilirubin; LA: left atrial diameter; IVS: interventricular septal thickness; LVDD: left ventricular end-diastolic diameter; LVPW: left ventricle post wall; RV: right ventricular end-diastolic diameter; AF: atrial fibrillation; COPD: chronic obstructive pulmonary disease; ACEI: angiotensin-converting enzyme inhibitors; ARB: angiotensin receptor blockers; ARNI: angiotensin receptor-neprilysin inhibitor; PCI: percutaneous coronary intervention; CABG: coronary artery bypass graft.

**Figure S1.** Selection of predictors related to all-cause mortality by the least absolute shrinkage and selection operator (LASSO) regression and Random Survival Forest (RSF)

**
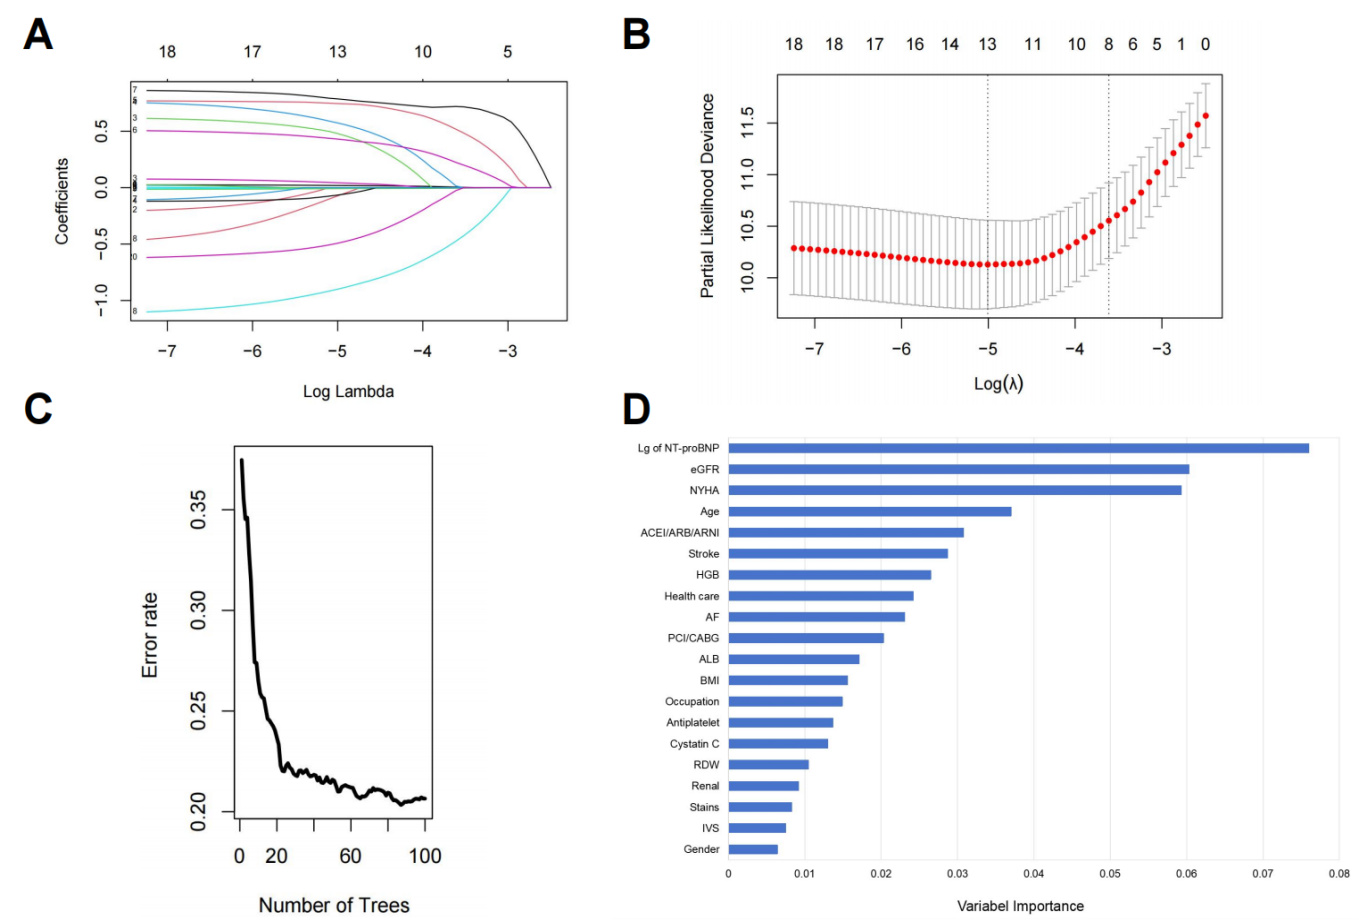
**

**Notes:** (A) Trajectory of LASSO regression model coefficients for the 20 predictors of all-cause mortality. (B) Error curve of cross-validation for selecting the optimal tuning parameter (Lambda, λ). Vertical lines are drawn at the minimum and 1-SE criteria values. The left line identifies the minimum model bias (λ = 0.007), indicating the best model fit when λ = 0.007. Vertical lines are drawn at the values selected by 10-fold cross-validation, including the optimized 13 non-zero coefficients. (C) RSF model error rate and Ntree plot. The out-of-bag estimation error rate was lowest (Error rate = 20.08%) when Ntree = 85. (D) Importance ranking plot of predictors for all-cause mortality determined by RSF, selecting the top 15 significant variables. Finally, 12 variables jointly selected by LASSO regression and RSF were subjected to subsequent multivariate Cox proportional hazard analysis.

**Figure S2.** Forest plot for all-cause mortality analysis of HFmrEF


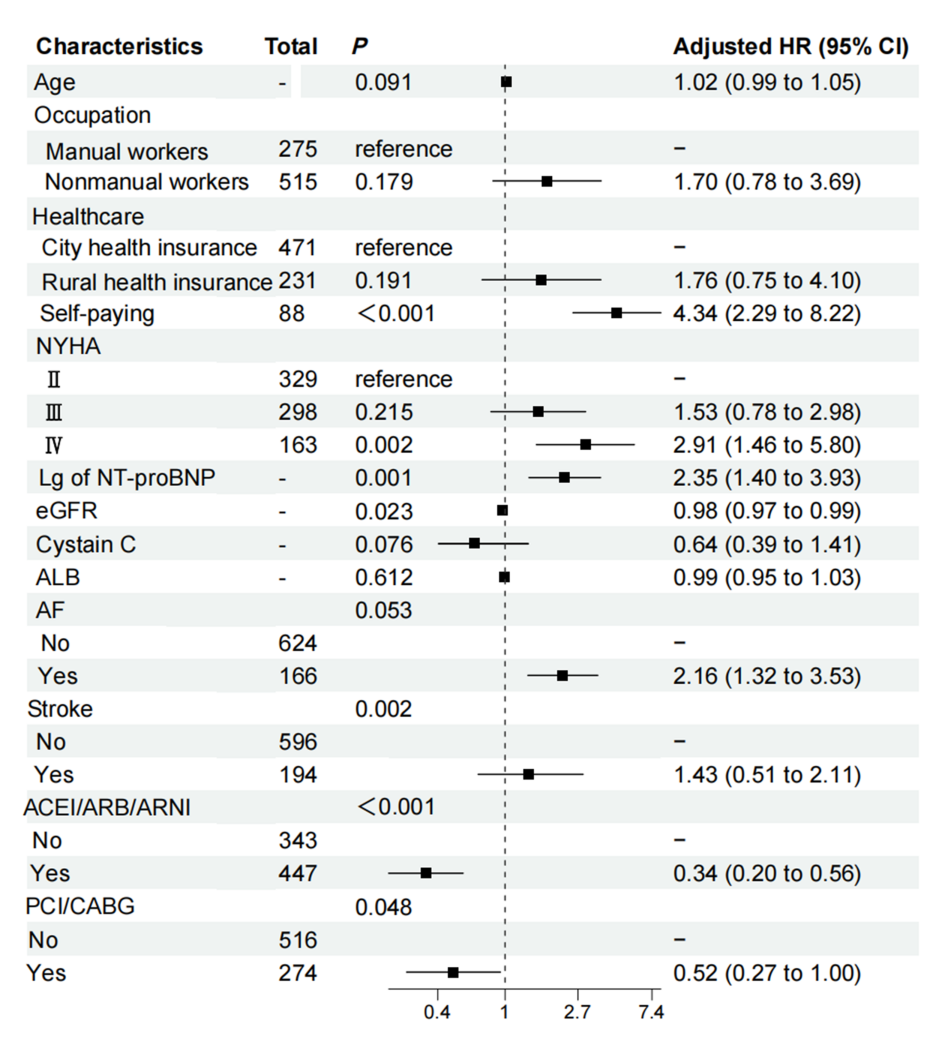


**Abbreviations:** NYHA: New York Heart Association; NT-proBNP: N-terminal pro-B-type natriuretic peptide; eGFR: estimated glomerular filtration rate; ALB: albumin; AF: atrial fibrillation; ACEI: angiotensin-converting enzyme inhibitors; ARB: angiotensin receptor blockers; ARNI: angiotensin receptor-neprilysin inhibitor; PCI: percutaneous coronary intervention; CABG: coronary artery bypass graft.

**Notes:** Forest plot with hazard ratio (HR) for the optimal prognostic variables of the final multivariable model in the development cohort. HRs above one indicate that a variable is positively associated with the event probability and thus negatively with survival time. A horizontal line parallel to the X-axis has a logarithmic scale that represents a more precise confidence interval (95% CI).

**Figure S3.** ROC curve and AUC for prognostic factors


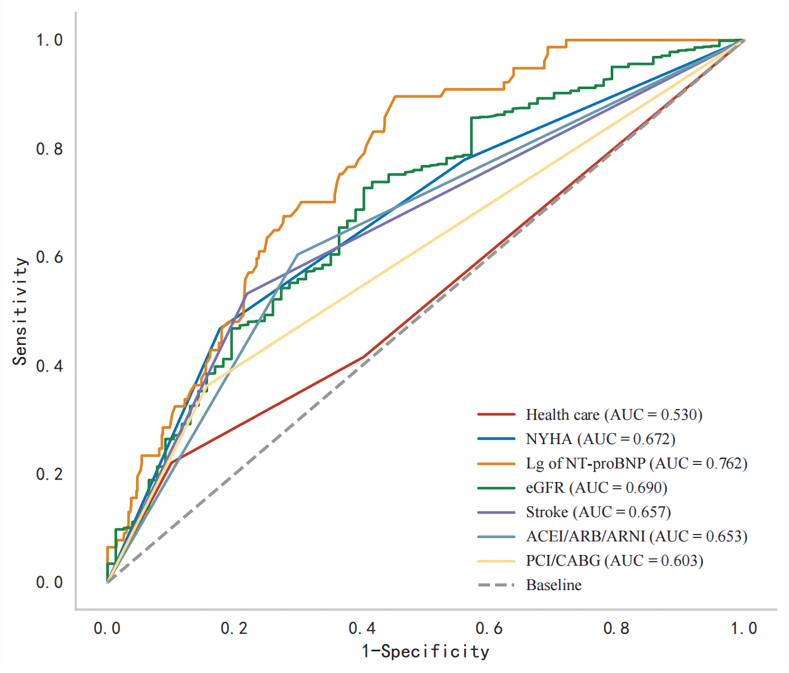


**Abbreviations:** NYHA: New York Heart Association; NT-proBNP: N-terminal pro-B-type natriuretic peptide; eGFR: estimated glomerular filtration rate; ACEI: angiotensin-converting enzyme inhibitors; ARB: angiotensin receptor blockers; ARNI: angiotensin receptor-neprilysin inhibitor; PCI: percutaneous coronary intervention; CABG: coronary artery bypass graft.

**Notes:** The greater the AUC, the better the prognostic factors for discriminating all-cause mortality. AUC, the area under the ROC curve.

**Figure S4.** Restricted cubic splines of Lg of NT-proBNP, eGFR, and HFmrEF all-cause mortality


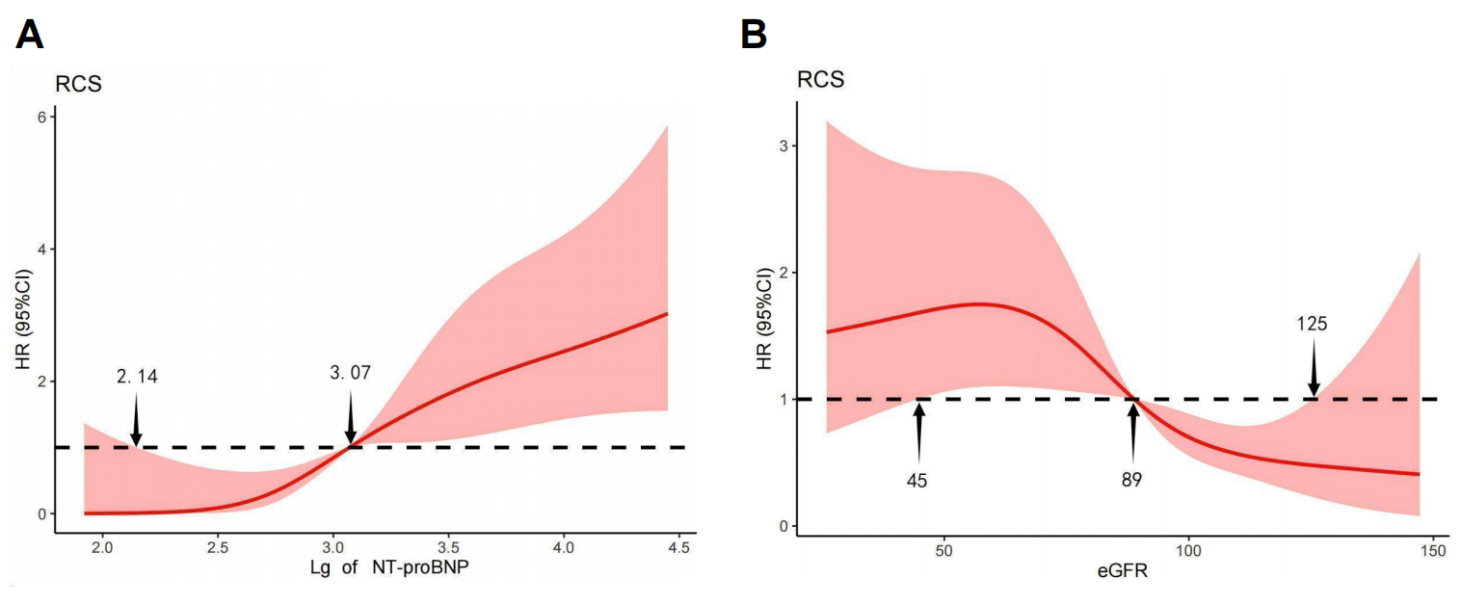


**Abbreviations:** NYHA: New York Heart Association; NT-proBNP: N-terminal pro-B-type natriuretic peptide; eGFR: estimated glomerular filtration rate; ACEI: angiotensin-converting enzyme inhibitors; ARB: angiotensin receptor blockers; ARNI: angiotensin receptor-neprilysin inhibitor; PCI: percutaneous coronary intervention; CABG: coronary artery bypass graft.

**Notes:** (A). lg of NT-proBNP. Adjusted healthcare、NYHA、stroke、eGFR、ACEI/ARB/ARNI、PCI/CABG; (B). eGFR. Adjusted healthcare、NYHA、stroke、lg of NT-proBNP、ACEI/ARB/ARNI、PCI/CABG.

**Figure S5.** X-tile stratification results


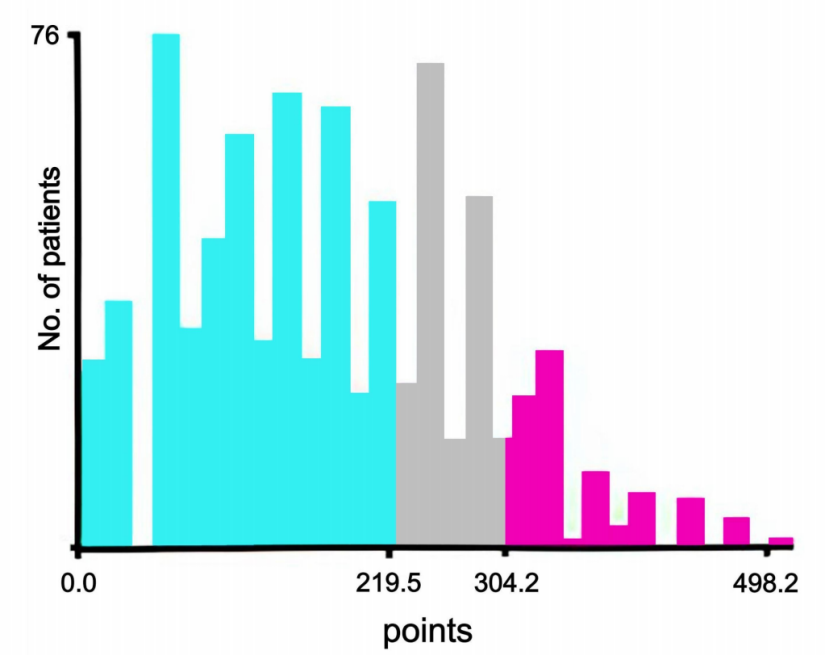


**Notes:** According to the total Norm diagram score of all patients, 219.5 and 304.2 were selected as the optimal cut-off points for stratification, and the patients were divided into three risk levels: high, medium, and low.

**Figure S6.** APSELNH decision tool on https://apselnh.shinyapps.io/APSELNH/ (A: ACEI/ARB/ARNI medicines, P: PCI/CABG therapy, S: Stroke, E:eGFR, L:lg of NT-proBNP, N: NYHA, H: Healthcare)


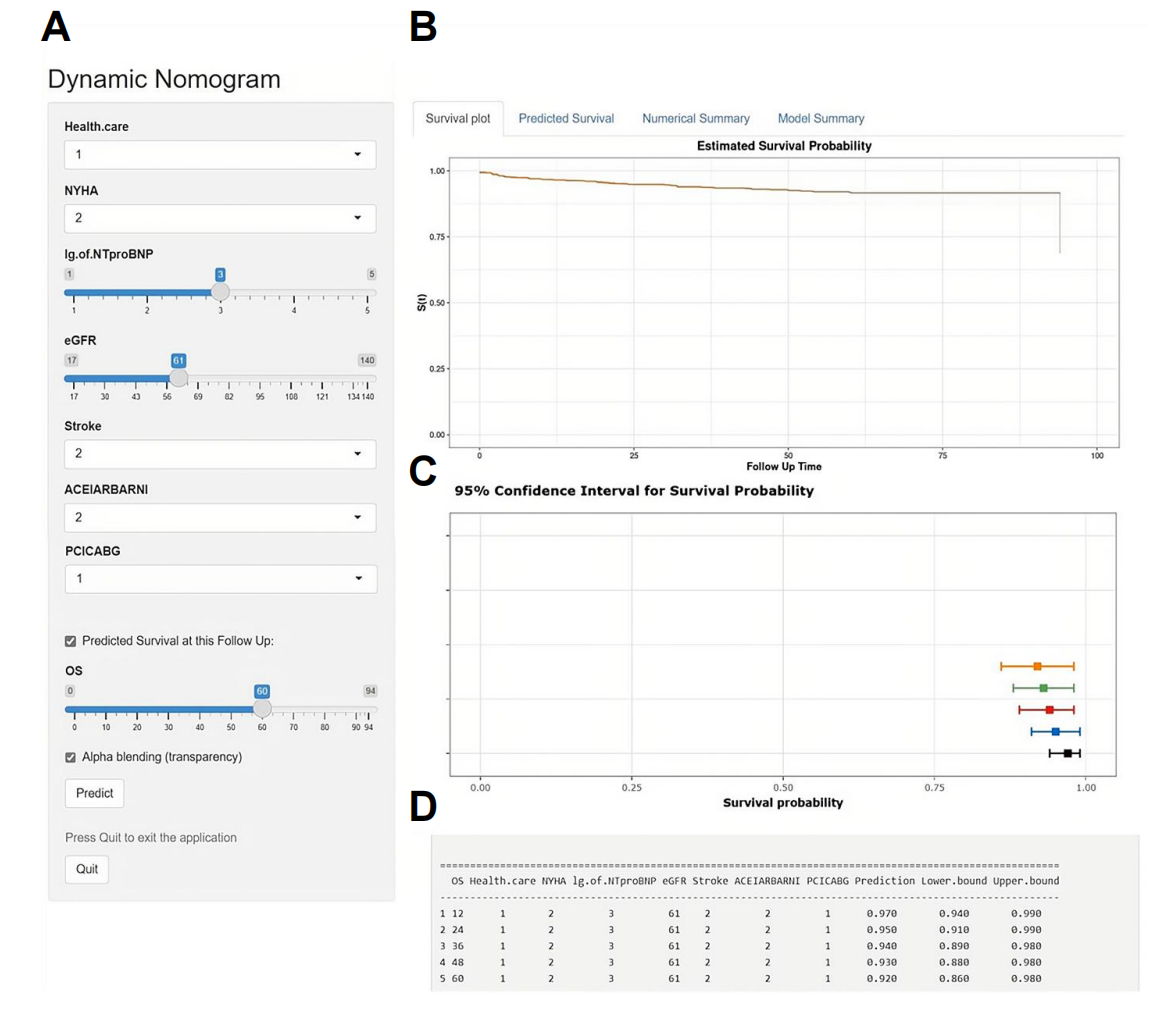


**Abbreviations:** NYHA: New York Heart Association; NT-proBNP: N-terminal pro-B-type natriuretic peptide; eGFR: estimated glomerular filtration rate; ACEI: angiotensin-converting enzyme inhibitors; ARB: angiotensin receptor blockers; ARNI: angiotensin receptor-neprilysin inhibitor; PCI: percutaneous coronary intervention; CABG: coronary artery bypass graft.

**Notes:** A. Input interface: Healthcare (1:Urban medical insurance; 2: Rural medical insurance; 3: Self-paying); NYHA (1: NYHA class II; 2: NYHA class III; 3: NYHA class IV); Stroke(1: No; 2: Yes); regular ACEI/ARB/ARNI medicines (1: No; 2: Yes); PCI/CABG therapy (1: No; 2: Yes). B. Survival plot: It represents the visualized HFmrEF participants’ corresponding estimated survival probability curve of 5 years. C. Predicted survival: It represents participants’ corresponding probability and 95% confidence intervals of developing HFmrEF in 12 (black line), 24 (blue line), 36 (red line), 48(green line), and 60 (orange line) months, respectively. D. Numerical summary: It shows the actual values of probability and 95% confidence intervals above five survival time points.
